# Supplementary material for: Fish and cephalopods monitoring on the Bay of Biscay and Celtic Sea continental shelves
Source: Copernicus journal article supplement (doi:10.5194/essd-2021-146), 2021-07-13
Supplement: Supplementary file [file essd-2021-146-RC1-supplement.pdf]

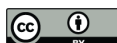

# 1 Fish and cephalopods monitoring on the Bay of Biscay and Celtic 2 Sea continental shelves

3 Pascal Laffargue<sup>1</sup>, Damien Delaunay<sup>3</sup>, Vincent Badts<sup>1</sup>, Olivier Berthele<sup>1</sup>, Anne-Sophie  
 4 Cornou<sup>1</sup>, François Garren<sup>2</sup>

5 <sup>1</sup> IFREMER, RBE-EMH research unit, Nantes, 44311, France

6 <sup>2</sup> IFREMER, RBE-STH research unit, Brest, 29280, France

7 <sup>3</sup> IFREMER, ODE-VIGIES research unit, Brest, 29280, France

8  
 9 Correspondence to: [pascal.laffargue@ifremer.fr](mailto:pascal.laffargue@ifremer.fr) , [harmonie@ifremer.fr](mailto:harmonie@ifremer.fr)

## 10 Abstract

11 The demersal fish and cephalopod communities of the continental shelves of the Bay of Biscay and the Celtic Sea  
 12 have been monitored for more than 30 years by the EVHOE series of fisheries surveys. Since 1987, a total of 4247  
 13 stations have been sampled in the fall with a GOV bottom trawl in a depth range of 15 to 600m. The main objective  
 14 of these surveys is to monitor 22 benthic fish stocks and 10 cephalopods but also to provide a description of the  
 15 distribution of a total of 250 fish and 50 commercial invertebrate taxa. The dataset  
 16 (<https://doi.org/10.17882/80041>) provides abundance and biomass information by station for all observed taxa.  
 17 Size distributions for a selection of species are also available. These data are part of a larger set of standardized  
 18 European surveys that provide essential information for monitoring demersal communities in the Northeast  
 19 Atlantic. We provide here a critical analysis of the dataset especially in terms of the evolution of the sampling  
 20 effort and strategy as well as the taxonomic precision.

## 21 1 Introduction

22 In North-East Atlantic, monitoring of exploited populations is based on an European network of observation  
 23 surveys at sea for both pelagic (International Pelagic Surveys, IPS) and benthic (International Bottom Trawl  
 24 Surveys, IBTS) species. This network is included in the European Data Collection Multi Annual Program  
 25 (Decision (EU) 2016/1701, EU-MAP Commission EU/2016/1251) to support the implementation of the European  
 26 Common Fisheries Policy (CFP). Even if the data must be combined with caution (Moriarty et al. 2020), these  
 27 scientific surveys provide consistent and standardized data (common protocols detailed in ICES, 2017) to ICES  
 28 assessment and science groups. In particular, the data allow stock assessors to analyze spatial and temporal  
 29 variations in the distribution and relative abundance of fish populations (notably pre-recruits) as well as those of  
 30 the biological parameters of the exploited species. These data thus provide fisheries independent abundance indices  
 31 for commercially valuable species and to collect hydrographical and environmental information.  
 32 On the basis of scientific surveys carried out in the North Sea, France aimed to develop comparable monitoring in  
 33 the Bay of Biscay. In this context, a French groundfish survey, named EVHOE ("EVALuation Halieutique de l'Ouest  
 34 Européen", ICES name "FR-EVHOE-Q4") was initiated in 1987, after two exploratory surveys in 1973 and 1976.  
 35 A research vessel, "RV Thalassa" (construction year 1960, 60 m length, 10.4 m width, 5 m draught), deployed  
 36 a standardized bottom trawl (GOV) to sample different strata in terms of bathymetry and latitude. Benthic and  
 37 demersal fish and cephalopods catches were identified, trip-weighted, measured and some specific species are  
 38 aged, sexed and their sexual maturity are described. The prospected area was extended in the whole Celtic Seas



39 since 1993 (Fig. 1), year of the starting of the new French research vessel also named “Thalassa” (construction  
 40 year 1996, 73.65 m length, 14.9 m width, 6.1 m draught).  
 41 EVHOE covers the Celtic Sea (ICES divisions 7fghj) and the French part of the Bay of Biscay (ICES divisions  
 42 8ab). The surveys were carried out in the fall from the end of October (distribution of sampling stations among the  
 43 survey months is shown in Fig.2) and extend from 15 to 600m depth. The collection of robust biological and  
 44 environmental data allowed to monitor 22 benthic fish and 10 cephalopods stocks (ICES 2019) from the North-  
 45 East Atlantic.

46 **Table 1: List of stocks monitored by EVHOE survey or for which the data are used for the calculation of**  
 47 **assessment indices**

| Components  | Species                           | Stock (ICES divisions)        | ICES code                      |
|-------------|-----------------------------------|-------------------------------|--------------------------------|
| Fish        | <i>Capros aper</i>                | 678                           | boc.27.6-8                     |
|             | <i>Chelidonichthys cuculus</i>    | 3-8                           | gur.27.3-8                     |
|             | <i>Gadus morhua</i>               | 7.e-k                         | cod.27.e-k                     |
|             | <i>Galeus melastomus</i>          | 67                            | sho.27.67                      |
|             |                                   | 89.a                          | sho.27.89a                     |
|             | <i>Lepidorhombus whiffiagonis</i> | 7.b-k8abd                     | meg.27.7b-k8abd                |
|             | <i>Lepidorhombus boscii</i>       | 7.b-k8abd                     | ldb.27.7b-k8abd                |
|             | <i>Leucoraja fullonica</i>        | 67                            | rjf.27.67                      |
|             | <i>Leucoraja naevus</i>           | 678.abd                       | rjn.27.678abd                  |
|             | <i>Lophius budegassa</i>          | 7.b-k8.abd                    | ank.27.78abd                   |
|             | <i>Lophius piscatorius</i>        | 78abd                         | mon.27.78abd                   |
|             | <i>Melanogrammus aeglefinus</i>   | 7.b-k                         | had.27.7.b-k                   |
|             | <i>Merlangius merlangus</i>       | 7.b-ce-k                      | whg.27.7b-ce-k                 |
|             | <i>Merluccius merluccius</i>      | 3.a46-8.abd                   | hke.27.3a46-8abd               |
|             | <i>Micromesistius poutassou</i>   | 1-91214                       | whb.27.1-91214                 |
|             | <i>Mustelus asterias</i>          | 1-101214                      | sdv.27.nea                     |
|             | <i>Pagellus bogitatus</i>         | 678                           | sbr.27.6-8                     |
|             | <i>Phycis blennoides</i>          | 1-101214                      | gfb.27.nea                     |
|             | <i>Raja clavata</i>               | 8                             | rjc.27.8                       |
|             | <i>Scomber scombrus</i>           | 1-89.a14                      | mac.27.nea                     |
| Crustaceans | <i>Scylliorhinus canicula</i>     | 67.a-ce-j<br>8.abd            | syc.27.67a-ce-j<br>syc.27.8abd |
|             |                                   | 7.agj (FU19)                  | nep.fu.19                      |
|             | <i>Nephrops norvegicus</i>        | 7.gh (FU20-21)<br>7.gf (FU22) | nep.fu.2021<br>nep.fu.22       |
|             |                                   | 8.ab (FU23-24)                | nep.fu.2324                    |
|             | <i>Alloteuthis</i>                | 8.ab                          | -                              |
| Cephalopods | <i>Illex coindetti</i>            | 8.ab                          | -                              |
|             | <i>Loligo forbesi</i>             | 8.ab                          | -                              |
|             | <i>Loligo vulgaris</i>            | 8.ab                          | -                              |
|             | <i>Rossia macrosoma</i>           | 8.abd                         | -                              |
|             | <i>Sepia elegans</i>              | 8.abd                         | -                              |
|             | <i>Sepia officinalis</i>          | 8.abd                         | -                              |
|             | <i>Sepia orbinyana</i>            | 8.abd                         | -                              |
|             | <i>Todarodes sagittatus</i>       | 8.ab                          | -                              |
|             | <i>Todaropsis eblanae</i>         | 8.ab                          | -                              |

48 From the initial and contractual stock assessment objectives, a more diversified data collection has been put in  
 49 place to progressively monitor the entire marine ecosystem. In addition to the fish and cephalopods species  
 50 historically observed, the entire benthic invertebrate community ("benthos") as captured by the trawl has now been  
 51 recorded since 2008. It provides information on regional biodiversity, improves our understanding of the structure

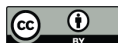

52 and functioning of communities, and addresses new issues related to human impacts from the effects of regional  
53 activities such as fishing to global effects such as climate change (*e.g.* Poulard and Blanchard 2005, Rochet,  
54 Trenkel et al. 2005).  implementation of the Marine Strategy Framework Directive (MSFD) in 2008 planned  
55 monitoring programs to provide data concerning offshore areas. The EVHOE survey was identified as a platform  
56 for observing the entire marine ecosystem of the Bay of Biscay and the Celtic Sea. An optimization work was  
57 realized from 2013 to 2015 to implement new protocols able to provide new data like seafloor litter  roplastics,  
58 zooplankton, contaminants, submarine noise (derived from AIS vessel tracking records) or hydrological data  
59 (Baudrier et al., 2018).  
60 In the present paper we provide details of the long term dataset for fish and cephalopods collected on the  
61 continental shelves of the Bay of Biscay and the Celtic Sea during the EVHOE survey. Non-commercial  
62 invertebrate ("Benthos") data are not included in this first dataset; they will be the subject of a later addition.

## 63 2 Data and methods

64 The EVHOE dataset provides information on catch of benthic and demersal fish and cephalopods of the Bay of  
65 Biscay and the Celtic Sea from 1987 to 2020. At the beginning of the series of surveys, the observations were  
66 exclusively carried out in the Bay of Biscay. From 1997 onwards the observation area has taken its current  
67 extension including the entire Celtic Sea. The research vessel ( also changed in 1997. The "old" R/V Thalassa  
68 ("Thalassa I"), the first French stern trawler dated of 1960 and used since the beginning of EVHOE survey was  
69 replaced by the actual R/V Thalassa ("Thalassa II") since 1996. Thalassa II is 73.65 m long and 14.9 m wide stern  
70 trawler (gross tonnage of 3022 t). An intercalibration experiment based on paired hauls was conducted in 1996 to  
71 estimate conversion coefficients between vessels (Pelletier, 1998). The temporal continuity of data time series may  
72 be hindered by a change in survey vessel and become a bias for estimating the abundance of populations in  
73 fisheries science.

### 74 2.1 Sampling strategy and gear

75 The usual season of observation is in autumn, but two years (1988 and 1991) also offered additional spring  
76 observations (Mahé & Poulard, 2005) but these data are not included into the published dataset. On the other hand,  
77 a few years were missing from the data series for autumn sampling (1991, 1993, 1996, 2017) ; the absence of a  
78 survey in these years were usually due to technical problems with the R/V. The studied area was limited to the  
79 Bay of Biscay, between the latitudes 43°40'N and 48°30'N, from 1987 to 1989. In 1990, the prospected area was  
80 extended to the South part of the Celtic Sea (latitude 51°15'N). During the change of research vessel in 1997, a  
81 revision of the objectives and sampling protocols was carried out and the observation area was extended to the  
82 whole Celtic Sea. 

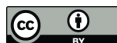

83 **Table 2: Chronology for the survey IBTS-Q4-EVHOE of the main features of the data acquisition**  
 84 **protocols**

| Year        | Vessel      | Areas                                          | Sampling strategy   | Fishing gear & geometry sensors                                                | Data management                                                                                   | Comments                                                                                        |
|-------------|-------------|------------------------------------------------|---------------------|--------------------------------------------------------------------------------|---------------------------------------------------------------------------------------------------|-------------------------------------------------------------------------------------------------|
| 1973 & 1976 | Thalassa I  | Bay of Biscay                                  | Randomly stratified | GOV36/47 no gear sensors                                                       | Data input in 2 steps: onboard paper and copy in “local spreadsheet /database”                    | Preliminary test surveys “RessGasc” not included into the dataset                               |
| 1987-1989   |             |                                                |                     |                                                                                |                                                                                                   | <b>Start of the EVHOE series</b>                                                                |
| 1990-1995   |             | Missing year: 1991 (spring only) and 1993      |                     |                                                                                |                                                                                                   |                                                                                                 |
| 1996        |             | Bay of Biscay, southern and central Celtic Sea |                     | GOV36/47 Gear sensors (Scanmar, not recorded)                                  | No data: intercalibration of R/V Thalassa I and II                                                |                                                                                                 |
| 1997        |             |                                                |                     | GOV36/47 Gear sensors (Scanmar / Marport from 2014, not recorded)              | First EVHOE survey with Thalassa II                                                               |                                                                                                 |
| 1998-2015   | Thalassa II | Bay of Biscay and whole Celtic Sea             | Fixed               | GOV36/47 (Marport sensors and trawl explorer, data recorded from 2017 onwards) | Data input in 2 steps: onboard paper forms & writing in a Microsoft-Access database               |                                                                                                 |
| 2015        |             |                                                |                     |                                                                                | Data input in 1 step with Allegro c. software* & writing in centralized/ database (“Harmonie”***) | Implementation of the new on-board data entry system “Allegro campagne”                         |
| 2016        |             |                                                |                     |                                                                                | Adding a connected electronic ichthyometer                                                        | New sampling strategy, strata Cn7, Cc7,Cs7 not included in the new scheme                       |
| 2017        |             |                                                |                     |                                                                                |                                                                                                   | Year not included into the dataset (only 15 points sampled due to technical issues)             |
| 2018-2019   |             |                                                |                     |                                                                                | Data control tools implementation ***                                                             | 2019 missing points into strata Cn2 and Cn3 due to meteorological issues                        |
| 2020        |             |                                                |                     |                                                                                |                                                                                                   | relocation of 4 stations of the Celtic Sea (within the same strata) to comply with UK MPA areas |

85 \* [www.ifremer.fr/allegro/](http://www.ifremer.fr/allegro/); \*\* Leblond et al. 2008; \*\*\* R shiny application for data control (“TUTTI  
 86 controller”)

87 The trawl used for sampling is a GOV 36/47 (“Grande Ouverture Verticale”, see description in ICES, 2017). From  
 88 the standard GOV trawl, the Exocet Kite is replaced by additional buoyancy 66 floats in-stead of 60, and 21 floats  
 89 of 4 litters compensate for the weight of Marport sensors placed in the middle of the headlin the gear has an  
 90 average horizontal opening around 20.6 m (wingspread range between 17 and 22m) and vertical opening around  
 91 4m (range from 3.5 to 5m). The doors are plane-oval of 1350 kg. Trawl sweeps of different lengths are used  
 92 depending on the operating depth: sweep of 50 m for depths less than 140 m, sweeps of 100 m for deeper depths



93 The net is fitted with a 20 mm codend liner. During the trawling, the gear parameters were monitored by “Scanmar”  
 94 system (Table 2) and in recent years by “Marport” system. The parameters that are monitored are the door spread,  
 95 the wing spread, the headline height and the height of ground rope. They allow appreciating the behavior of the  
 96 gear during fishing operations but also to assess the area or even the volume sampled. The accuracy of trawling  
 97 parameters has therefore evolved over time and the data from the trawl geometry sensors were not recorded until  
 98 year 2017. In order to preserve the homogeneity of the dataset, and despite the existence of actual trawl parameters  
 99 values recorded from 2017 onward, standard median value of horizontal trawl opening (20.6 m) is utilized. The  
 100 swept area (about 0.076 km<sup>2</sup> for a standard 30’ tow) was then calculated from the distance covered by the trawl.  
 101 The file also provides the duration of the haul, which is a useful standard effort value when combining data from  
 102 different surveys using a similar fishing gear. Moreover, the trawl is equipped with a CTD probe allowing for each  
 103 station to record temperature, depth and salinity profiles (the latter only for stations less than 300m deep).  
 104 Additionally, a number of navigational parameters or meteorological variables were also monitored but are not  
 105 included into the published dataset.  
 106 The sampling scheme defined a geographic stratification that separates the Bay of Biscay in 2 areas and the Celtic  
 107 Sea into 3 areas and seven depth strata from 20 m to 600 m (Fig. 1 and Table 3). From 1987 to 2015, the sampling  
 108 strategy followed a stratified random strategy (Fig. 1). A Neyman allocation on numbers were averaged on the  
 109 4 most important commercial species (hake, the two species of monkfish and northern megrim) was utilized to set  
 110 the number of stations per stratum. The number of stations proportional to the surface of the stratum and minimum  
 111 of two stations per stratum. Each sampled station was obtained by random selection from a set of reference stations  
 112 trawlable in the sampled area with the aim of sampling at least 140 stations per year. The area covered included  
 113 only the Bay of Biscay in 1987, it was extended to the southern part of the Celtic Sea from 1990 (not sampled in  
 114 1994 and 1995 following damage to the propulsion engine) and since 1997 has covered the whole of the Bay of  
 115 Biscay and the Celtic Sea.  
 116 From 2016, the sampling strategy was changed to a fixed sampling strategy. The reason for this change was that  
 117 the spatial coverage of some large strata was too highly variable from one year to another. Thus, depending on the  
 118 random selection of points, areas of significant size were not observed. The stabilization of sampling points also  
 119 facilitated analyses that aimed at studying the spatial structures of species or communities and their evolution over  
 120 time. Finally, this change made it possible to better harmonize the sampling strategies with the “IBTS” campaigns  
 121 of other countries. The random selection of stations in 2016 (total number = 155) has been utilized as the reference  
 122 sampling scheme for the next years. The new sampling design did not include some stations into the Celtic deeper  
 123 strata (Cs7, Cc7 and Cn7), as well as the points sampled in some part of the shallowest strata of the Bay of Biscay  
 124 (e.g. some rarely sampled points into enclosed bays). In the central-eastern part of the Celtic sea, we added 4  
 125 additional to complete strata coverage.  
 126 Sampling was carried out with straight tows during the daylight, lasting 30 minutes at the bottom (a minimum of  
 127 20 minutes accepted in the protocols to validate a haul) at a constant speed of 4 knots. Some tows were stopped  
 128 before the end of the total trawl time when excessively high tensions were detected (a sign of large catches) or  
 129 more recently (from 2018 onward) when a strong pelagic acoustic signal was observed from the on-board sounders.  
 130 These tows were considered valid and included in the dataset when they lasted at least 20 minutes and that the  
 131 fishing gear has not suffered any damage. They represent less than 10% of the tows (about 2 to 14 tows per year)  
 132 with higher proportions in recent years due to the improved control of the trawl variables described above.



133 **Table 3: Description of sampling strata for IBTS-Q4 Evhoe.**

| Name                              | Code         | Median depth (m) | Surface (km <sup>2</sup> ) |
|-----------------------------------|--------------|------------------|----------------------------|
| <b>EVHOE survey</b>               | <b>EVHOE</b> |                  | <b>235420</b>              |
| <b>Bay of Biscay area</b>         | <b>GG</b>    |                  | <b>75856</b>               |
| <b>Southern BoB sector</b>        | <b>Gs</b>    | <b>116</b>       | <b>15308</b>               |
| strata 1                          | Gs1          | 27               | 1960.11                    |
| strata 2                          | Gs2          | 44               | 4641.41                    |
| strata 3                          | Gs3          | 111              | 4014.68                    |
| strata 4                          | Gs4          | 156              | 2994.62                    |
| strata 5                          | Gs5          | 187              | 441.75                     |
| strata 6                          | Gs6          | 379              | 599.35                     |
| strata 7                          | Gs7          | 508              | 656                        |
| <b>Northern BoB sector</b>        | <b>Gn</b>    | <b>121</b>       | <b>60548</b>               |
| strata 1                          | Gn1          | 26               | 8201.69                    |
| strata 2                          | Gn2          | 63               | 11771.07                   |
| strata 3                          | Gn3          | 105              | 17327.21                   |
| strata 4                          | Gn4          | 137              | 18854.03                   |
| strata 5                          | Gn5          | 184              | 1612.12                    |
| strata 6                          | Gn6          | 302              | 1090.2                     |
| strata 7                          | Gn7          | 518              | 1691.76                    |
| <b>Celtic Sea area</b>            | <b>MC</b>    |                  | <b>159564</b>              |
| <b>Southern Celtic sea sector</b> | <b>Cs</b>    | <b>151</b>       | <b>63269</b>               |
| strata 4                          | Cs4          | 139              | 41500.49                   |
| strata 5                          | Cs5          | 175              | 15204.87                   |
| strata 6                          | Cs6          | 252              | 3995.49                    |
| strata 7                          | Cs7          | 457              | 2564.25                    |
| <b>Central Celtic Sea sector</b>  | <b>Cc</b>    | <b>127</b>       | <b>59025.29</b>            |
| strata 3                          | Cc3          | 105              | 20267.46                   |
| strata 4                          | Cc4          | 128              | 28211.7                    |
| strata 5                          | Cc5          | 164              | 5309.6                     |
| strata 6                          | Cc6          | 307              | 3490.58                    |
| strata 7                          | Cc7          | 512              | 1746.04                    |
| <b>Northern Celtic Sea sector</b> | <b>Cn</b>    | <b>81</b>        | <b>37270.1</b>             |
| strata 2                          | Cn2          | 68               | 14828.35                   |
| strata 3                          | Cn3          | 99               | 22441.75                   |

## 134 2.2 Samples sorting, species identifications, biological measurements and sampling

135 Wherever possible, the entire catch was sorted, with fish and commercial shellfish, crustaceans and  
 136 cephalopods species identified to the lowest taxonomic level. On the other hand, when the total catch in the trawl  
 137 was too large (*e.g.* several tons of small pelagic fish), only a fraction of the total catch was fully processed (mostly  
 138 1/2 to 1/4 and exceptionally >1/5 of the total catch weight). For the partially sorted part, individuals of rare or  
 139 particularly large species were still extracted and processed. On average for the recent years (from 2014), those  
 140 partially processed tows represented 11 to 18% of the total number of stations. Due to a lack of data, this proportion  
 141 could not be properly assessed for surveys prior to 2014. It can be assumed that this proportion may have been  
 142 higher in the past, particularly at Thalassa I, due to less efficient sorting facilities.

143 Individuals lengths were recorded for most fish species and some commercially important cephalopods  
 144 and shellfish species. Individuals Length was measured at the lower half-centimetre level for small species of  
 145 pelagic fish, and to the lower 1 cm level for all other fish and cephalopods species. A representative sample was  
 146 selected (ideally >10 times the number of length classes) when the number of individuals caught was too large to



be fully measured on board. Sex was determined for a set of fish and commercial invertebrates species (32 to 54 species depending on years and 107 species for the whole time series). For about 20 fish species, ageing material was collected (otoliths, ilicia or scales) and individual weight, length measurements and determination of maturity stages from 2000 onwards were carried out with a sampling strategy following a stratified allocation by length class and by sex. However, these data required significant revision and were not included in the submitted version of the dataset. They will be the subject of an additional publication.

Data entry on board was initially carried out on paper forms that were then copied to computer databases. Starting in 1997, on the R/V *Thalassa-2*, a computer system for recording catches ("pupitri") allowed for the automated banking of species and their total weight, with individuals informations (sex, counts, size measurements, maturity) still being entered on paper forms. These data were then transferred to an internal database under "Microsoft Access" software (database specific to the EVHOE campaign, not standardized with others IFREMER databases). From 2014 onwards, data was recorded on board with an open-source software especially developed for fisheries surveys ("Allegro Campagne" software, <http://www.ifremer.fr/allegro/>, <https://forge.codealutin.com/projects/tutti>). From 2016 onwards, the lengths were also measured using an electronic ichthyometer directly connected to the data management system. Only the sizes of the largest individuals (> 85cm) and the weight data of the sub-samples and individuals fish were still entered manually. In addition, a set of automated data control and correction tools were put in place in recent years (both within the "Allegro" software and from separate dedicated tools greatly improved in 2020). These tools have been applied a posteriori on the whole data series; the EVHOE dataset proposed here (Laffargue et al. 2021) has therefore been significantly corrected.

The dataset consists of 3 tables in a ".csv" file format (Table 4): the "Haul" table provides stations metadata, the "Catch" table including taxa number and biomass, the "Size" table providing length and sex observations for a short list of species. The data provided are identical to the raw data stored in IFREMER's internal database ("Harmonie") and have not been subject to any modifications other than those necessary to recalculate the total catch in the event of subsampling. The "World Register of Marine Species" (WoRMS Editorial Board, 2020) was used to update the taxonomy (valid names and Aphia ID) by utilizing dedicated R packages (« worms 0.2.2" and "worms 0.4.0"). The provision of this dataset makes it possible to give it an official reference (<https://doi.org/10.17882/80041>), to make updates more easily accessible and, above all, to provide additional information that is not included in the ICES databases, particularly in connection with the evolution of the protocols. The proposed format will make it possible to link the data coming from other biological compartments (e.g. benthos) or environmental observations observed on the same survey but not included in the original protocols.

A set of videos made on board provide additional elements of understanding of all the operations performed and the protocols applied (Lesbats et al. 2019a,b).

**Table 4: Tables and fields included in the EVHOE dataset**



| Field name | Data table |       |      | Description                                                                    |
|------------|------------|-------|------|--------------------------------------------------------------------------------|
|            | Haul       | Catch | Size |                                                                                |
| Survey     | X          | X     | X    | Survey name                                                                    |
| Year       | X          | X     | X    | year of sampling                                                               |
| StationID  | X          | X     | X    | unique haul ID                                                                 |
| Month      | X          |       |      | month of the sampling                                                          |
| Distance   | X          |       |      | sampled distance in m                                                          |
| Area       | X          |       |      | sampled area in km <sup>2</sup>                                                |
| Duration   | X          |       |      | haul duration in minutes                                                       |
| Lat        | X          |       |      | Haul latitude in decimal degrees                                               |
| Lon        | X          |       |      | Haul longitude in decimal degrees                                              |
| Depth      | X          |       |      | mean depth of the sampled station in m                                         |
| Taxa       |            | X     | X    | scientific name of the taxa                                                    |
| AphiaID    |            | X     | X    | International unique code for taxa                                             |
| Number     |            | X     | X    | number of individuals for a given haul, length or sex category                 |
| WeightKg   |            | X     |      | Total weight in kg for the taxa in the haul                                    |
| Sex        |            |       | X    | individuals sex category, N: not observed, I: undetermined, M: male, F: female |
| Length     |            |       | X    | length class of the individuals in cm                                          |

181 In addition to a description of the data, we propose a short critical analysis by comparing in particular the evolution  
 182 of the specific richness on the whole series. These results are based on a bootstrap analysis using richness estimates  
 183 from a random selection of stations and from 1000 permutations (R specaccum function from vegan 2.5.6 library,  
 184 Oksanen et al 2019, R Core Team 2019).

### 185 3 Data availability

186 The updated EVHOE dataset is provided on the SEANOE platform (Laffargue et al. 2021,  
 187 <https://doi.org/10.17882/80041>) which includes automatic duplication to the EMODnet marine data portal  
 188 (<https://www.emodnet-ingestion.eu>). The raw collected data were currently banked on an IFREMER's internal  
 189 general database (Harmonie) collecting in a standardized way the whole data flow of IFREMER fisheries  
 190 information system (<https://sih.ifremer.fr/Donnees>). Moreover, the data were annually reported to the ICES  
 191 database DATRAS (<http://www.ices.dk/marine-data/data-portals/Pages/DATRAS.aspx>).

### 192 4 Discussion: dataset content & quality

193 The EVHOE series dataset offers a standardized observation of all benthic-demersal ichthyofauna, cephalopods  
 194 species and some large invertebrates for a long-term series of 32 and 22 years for the Bay of Biscay and Celtic Sea  
 195 respectively. This survey series inventoried a total of 658 marine taxa (Fig. 3A). The proposed dataset includes





250 “fishes” (including 34 elasmobranchs, Fig. 3C) and 50 “commercial” invertebrates species (mainly  
 cephalopods and some crustaceans, gastropods and bivalvia, Fig. 3B-D) but does not include the 408 taxa of others  
 non-commercial invertebrates (“benthos”) recently inventoried (from 2008 onwards). In the complete dataset for  
 both the Bay of Biscay and the Celtic Sea, pelagic fish largely dominate the catches both in number and biomass  
 (Fig. 4) with 6 main species (*Capros aper*, *Trachurus trachurus*, *Micromesistius poutassou*, *Scomber scombrus*,  
*Engraulis encrasicolus* and *Sardina pilchardus*) and this even if the trawl used does not target and presents a very  
 relative efficiency for this compartment. Among the demersal fish for the whole series of data, 3 species  
 (*Merluccius merluccius*, *Trisopterus minutus*, *Trisopterus luscus*) largely dominated the catches in the Bay of  
 Biscay, in the Celtic Sea the pout (*T.minutus*) is also among the main species but this area stands out with the  
 dominance of *Trisopterus esmarkii*, haddock (*Melanogrammus aeglefinus*) and whiting (*Merlangius merlangus*).  
 However, the complete biological dataset, particularly for the Bay of Biscay (1987-present), should be considered  
 with caution. The change of vessel in 1996 and the intercalibration work has shown significant differences in the  
 catchability of the gears for some of the species caught. A number of conversion parameters between the 2 research  
 vessels were proposed (Pelletier, 1998) but they do not cover all the species observed. Moreover, some species are  
 poorly captured by the gear used (e.g. burrowing crustaceans like *Nephrops*, or flatfishes like *Solea solea*) or the  
 sampling strategy does not correctly reflect their distribution for part or all of their life history (e.g. species with  
 juvenile in shallow water nurseries). The low sampling effort in the shallowest areas (strata 1) in comparison with  
 the diversity of habitats and associated communities makes the description of benthic communities by this dataset  
 unreliable in this strata.

Observed total species richness varies among year and main areas with three main periods (Fig. 5A-B): years 1987  
 to 1990 with a lower richness, years 1992 to 2000 with intermediate values and highest values for the years after  
 2000 (with the exception of a low value in 2003). The similarity of the species list within these years groups is  
 also stronger (see cluster results for the years, Fig. 5C-D). Although at the survey level an evolution of the sampling  
 strategy may account for differences in diversity (e.g. “apparition” of *Trisopterus esmarkii* in 1990 linked to the  
 extension in the Celtic Sea), these variations can not only be attributed to a change in the sampling strategy or to  
 a natural evolution of the monitored ecosystems. We can notice that there is greater variability in species richness  
 during the first decade of the data series, particularly visible for the Bay of Biscay areas (Gs, Gn), with interannual  
 variations that are sometimes very large despite an equivalent sampling effort per area. Overall, a «stabilisation»  
 of the annual specific richness has been observed from the 2000s onwards, which mainly reflects a better  
 consideration of all species and a reliability or stabilization of the taxonomic skills of the on-board teams. Diversity  
 analysis or monitoring of a particular species must take into account possible observation deficiencies. For  
 example, the species *Arnoglossus imperialis* is relatively less frequent in the initial part of the survey series (1987-  
 1992) compared to the more recent period. This difference most probably comes from confusion with the closely  
 related species *A. laterna*. Moreover, new taxonomic determination efforts increased the number of species  
 considered as «common ones» (e.g. from 2010 onward 11 species added to the previously sepiolidae family).  
 A table provided in the appendix summarized the information about the taxa with identification issues or  
 improvements that occurred during the EVHOE time series.

Moreover, difficulties of identification for some rare species or including not very obvious morphological criteria  
 reduces the validity of this series for some taxa that should be considered with caution (Appendix A). Even if we  
 do not explicitly propose a priori regrouping or modification of the dataset, some of those species should be



considered for grouping for part or the whole time series according to the desired applications. However, the accuracy of the determination has globally increased and become more reliable over time. The stabilization of the sorting effort, the reduction of the work-load (*e.g.* sorting conveyor belts of the *Thalassa* 2) and the improvement of the sorting quality thanks to the support of the new computer tools but also the improvement of the quality of the species determination are important factors in the quality increase of the EVHOE series. This stabilization of quality is especially important for analysis and development of relevant indicators in a context of important changes in marine communities under the ~~double~~ effect of local or global anthropogenic pressures (*e.g.* fishing or climate).

The observation scale of EVHOE survey is particularly relevant for covering certain populations, fish stocks or even the biogeographical dimension for certain monitored species. These data are already valued in an operational framework to provide useful indices for fish stock assessment (IFREMER 2020, ICES 2020, Tab.1) or for the assessment of marine ecosystems as developed, for example, for the European Marine Strategy Framework Directive (MSFD, EC, 2008 ; EC, 2017) or in the OSPAR Convention (OSPAR, 2017). The environmental status of fish biodiversity or fisheries resources is assessed from common indicators using EVHOE data (Brind'Amour & Delaunay, 2018 ; Foucher & Delaunay, 2018). Under the MSFD implementation, the EVHOE scientific survey integrates the monitoring program due to standardised methods for monitoring, including spatial and temporal sampling strategies (EC, 2020 ; France, 2015). These data are used to calculate an abundance indice to fill the DIC2 criterium relative to the abundance of fish population. Time series of the indice are analyzed to describe the ecological status of the demersal fish group. It guides the definition of environmental objectives and measures program to achieve or maintain good environmental status of French marine ecosystems. Differents parameters collected during EVHOE were used to evaluate other criteria as DIC3 relative to demographic characteristics or DIC4 relative to geographical distribution of fish population. In another framework, OSPAR Convention aims to achieve a network of well-managed marine protected areas which is ecologically coherent. The quality status of the North-East Atlantic is regularly assessed. EVHOE data were used to calculate different indicators as FC1 - Recovery in the population abundance of sensitive fish species, FC2 - Proportion of large fish (Large Fish Index) or FW3 - Size composition in fish communities (OSPAR, 2017).

We can also note the interest of the data produced to identify certain elements of the remarkable diversity that is all the more appreciable with the improvement in the quality of species determination. In particular, the detection of rare or new species in the study area are valuable data for characterizing regional biodiversity and judging the evolution of continental shelf communities.

The strength of this series also lies in the additional data (hydrological, other biological compartments) acquired simultaneously and offering an increasingly complete panorama of the ecosystems of the continental shelves in the fall period. These additional observations, which are sometimes relatively recent, are processed independently of this dataset and will be the subject of subsequent publications.

## 5 Table caption

**Table 1: List of stocks monitored by EVHOE survey**

**Table 2: Chronology of the main features of the data acquisition survey IBTS-Q4-EVHOE**

**Table 3: Description of sampling strata for IBTS-Q4 Evhoe.**

**Table 4: Description of data tables and associated fields**

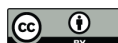

## 6 Figure caption

**Figure 1: Sampling area of IBTS-Q4 EVHOE survey** A. description of the strata for each sectors, Celtic Seas (Cn:north,Cc:central, Cs:south) and the bay of Biscay (Gn:north, Gs:south) and positions of the sampled points. B - initial randomly stratified sampling plan (1987), C - addition of the Celtic sea (1997), D - stabilized sampling plan (2016 to now). Roman numerals of the ICES divisions are also indicated (8.a to 8.f and 7.d to 7.j).

**Figure 2: Distribution of stations sampled for the whole Evhoe time series**, A. proportion by sampling months, B. proportion by sampling sectors for autumn survey (only for autumn months: 9,10,11,12). The black lines on both graphs indicates the total number of sampled stations by year.

**Figure 3: Number of taxa observed for the whole time series**, A. number per classes for all the taxa (including the benthos species), B. number per order for fishes taxa only, C. number per classes for commercial list of taxa only (standard evhoe protocole) and D. for “commercial invertebrates” taxa.

**Figure 4: Abundance in number and biomass of the 10 main species observed in the Celtic Sea during EVHOE 1997-2018 and in the Bay of Biscay during EVHOE 1987-2018 for 4 main groups of species: Benthic Demersal Actinopterygii, Pelagic Actinopterygii, Elasmobranchii and Commercial invertebrates.**

**Figure 5: Boxplots of the fish taxa richness as obtained from bootstrap analysis of the sampling station richness. The colors indicates the clusters depending on years similarities. Analysis is separately performed for the Bay of Biscay and the Celtic Sea for the whole available time series**

## References

- Baudrier J., Lefebvre A., Galgani F., Sarau C. and Doray M.: Optimising French fisheries surveys for marine strategy framework directive integrated ecosystem monitoring . *Marine Policy* , 94, 10-19 .  
<https://doi.org/10.1016/j.marpol.2018.04.024>, 2018
- Brind'Amour A. and Delaunay D. : Evaluation de la composante de l'écosystème « Poissons et céphalopodes » du descripteur 1 « Biodiversité » en France métropolitaine. Rapport scientifique de l'Ifremer pour l'évaluation 2018 au titre de la DCSMM. R.RBE/EMH-2018-01 . <https://archimer.ifremer.fr/doc/00458/57007/>, 2018
- European Commission (EC): Directive 2008/56/EC of the European Parliament and of the Council of 17 June 2008 establishing a framework for community action in the field of marine environment policy (Marine Strategy Framework Directive. Official Journal of the European Union, 25.6.2008 L 164: 19–40, 2008
- European Commission (EC): Commission Decision (EU) 2017/848 of 17 May 2017 laying down criteria and methodological standards on good environmental status of marine waters and specifications and standardised methods for monitoring and assessment, and repealing Decision 2010/477/EU, 2017
- European Commission (EC): Reporting on the 2020 update of Article 11 for the Marine Strategy Framework Directive (MSFD Guidance Document 17). Brussels. Pp 51., 2020
- Foucher E. and Delaunay D. : Evaluation du descripteur 3 « espèces exploitées à des fins commerciales » en France métropolitaine. : Rapport scientifique pour l'évaluation 2018 au titre de la DCSMM - R.RBE/HMMN/RHPEB-2018-01 . <https://archimer.ifremer.fr/doc/00458/57009/>, 2018
- France. : Arrêté du 28 avril 2015 relatif aux critères et méthodes pour l'élaboration et la mise en œuvre du programme de surveillance du plan d'action pour le milieu marin. JORF n°0103 du 3 mai 2015, p7667. DEVL1425248A., 2015
- ICES.: Report of the Workshop for maturity staging chairs (WKMATCH), 11–15 June 2012, Split, Croatia. ICES CM 2012/ACOM:58. 57 pp., 2014



- 317 ICES. : Manual of the IBTS North Eastern Atlantic Surveys - Version 4.0 - IBTSWG. Series of ICES survey
- 318 protocols - SISP 15 - <http://doi.org/10.17895/ices.pub.3519>, 2017
- 319 ICES.: Working Group on Cephalopod Fisheries and Life History (WGCEPH). Volume 2 / Issue 46 -
- 320 <http://doi.org/10.17895/ices.pub.6032>, 2019
- 321 ICES.: "Dataset collections" portal of the ICES. <https://ices.dk/data/dataset-collections>, 2020
- 322 Ifremer. Population and community indices derived from scientific surveys carried out by Ifremer.
- 323 <http://www.ifremer.fr/SIH-indices-campagnes> (11/05/2020), 2020
- 324 Laffargue P., Delaunay D., Badts V., Berthele O., Cornou A.-S., Garren F.: **Long term benthic community**
- 325 **dataset for fish and cephalopods on the continental shelves of the Bay of Biscay and the Celtic Sea**. SEANOE.
- 326 <https://doi.org/10.17882/80041>, 2021
- 327 Lesbats Stephane, Garren Francois. : Tutoriel vidéo campagne halieutique - chalutage.
- 328 <https://image.ifremer.fr/data/00624/73617/>, 2019a
- 329 Lesbats Stephane, Garren Francois, Le Roy Didier. : Tutoriel vidéo campagne halieutique - fonctionnement de la
- 330 salle de tri du N/O Thalassa. <https://image.ifremer.fr/data/00624/73650/>, 2019b
- 331 Leblond, E., Daures, F., Berthou P., Dintheer C.: The Fisheries Information System of Ifremer: a
- 332 multidisciplinary monitoring network and an integrated approach for the assessment of French fisheries,
- 333 including small-scale fisheries. ICES 2008 Annual Science Conference, 22-26 september 2008, HALIFAX,
- 334 CANADA., 2008
- 335 Mahe J.-C. and Poulard J.-C. : Manuel des protocoles de campagne halieutique. Campagnes EVHOE (EValuation
- 336 des ressources Halieutiques de l'Ouest Europe). DSTH/LBP/05-xxx.
- 337 <https://archimer.ifremer.fr/doc/00036/14707/>, 2005
- 338 Moriarty M., Sethi S. A, Pedreschi D., Smeltz T. S., McGonigle C., Harris B., Wolf N., Greenstreet S. P. R.:.
- 339 Combining fisheries surveys to inform marine species distribution modelling. ICES Journal of Marine Science
- 340 77(2): 539-552., 2020
- 341 Oksanen J., Blanchet F. G., Friendly M., Kindt R., Legendre P., McGlinn D., Minchin P.R., O'Hara R. B.,
- 342 Simpson G.L., Solymos P., H. Stevens M.H., Szoecs E. and Wagner, H. vegan: Community Ecology Package. R
- 343 package version 2.5-6. <https://CRAN.R-project.org/package=vegan>, 2019
- 344 OSPAR.: Summary Status of the OSPAR Network of Marine Protected Areas (2016). Intermediate Assessment
- 345 2017. Available at: [https://oap.ospar.org/en/ospar-assessments/intermediate-assessment-2017/biodiversity-](https://oap.ospar.org/en/ospar-assessments/intermediate-assessment-2017/biodiversity-status/marine-protected-areas/)
- 346 [status/marine-protected-areas/](https://oap.ospar.org/en/ospar-assessments/intermediate-assessment-2017/biodiversity-status/marine-protected-areas/), 2017
- 347 Pelletier D.: Intercalibration of research survey vessels in fisheries: a review and an application . *Canadian Journal*
- 348 *Of Fisheries And Aquatic Sciences* , 55(12), 2672-2690 . <https://doi.org/10.1139/cjfas-55-12-2672>, 1998
- 349 Poulard, J.-C. and Blanchard F.: "The impact of climate change on the fish community structure of the eastern
- 350 continental shelf of the Bay of Biscay." ICES Journal of Marine Science 62(7): 1436-1443,2005
- 351 R Core Team. R: A language and environment for statistical computing. R Foundation for Statistical Computing,
- 352 Vienna, Austria. URL <https://www.R-project.org/>, 2019
- 353 Rochet, M.-J., Trenkel V., Bellail R., Coppin F., Le Pape O., Mahe J.-C., Morin J., Poulard J.-C., Schlaich I. and
- 354 Souplet A.: "Combining indicator trends to assess ongoing changes in exploited fish communities: diagnostic of
- 355 communities off the coasts of France." ICES Journal of Marine Science 62(8): 1647-1664, 2005

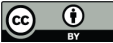

ICES.: International Bottom Trawl Survey Working Group (WGIBTS,  
<https://www.ices.dk/community/groups/Pages/IBTSWG.aspx>)  
 WoRMS Editorial Board.: World Register of Marine Species. Available from <http://www.marinespecies.org> at  
 VLIZ. Accessed 2020-11-30. doi:10.14284/170, 2020

360

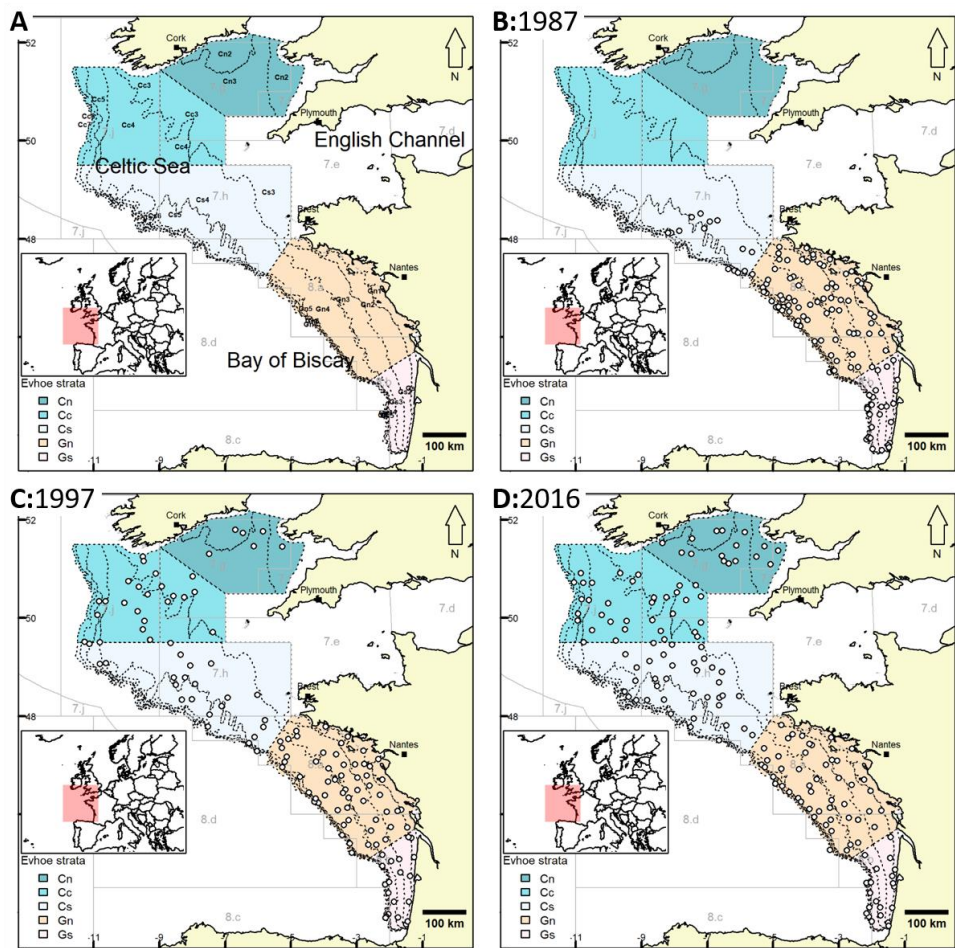

361

362 **Figure 1: Sampling area of IBTS-Q4 EVHOE survey** A. description of the strata for each sectors, Celtic  
 363 Seas (Cn:north,Cc:central, Cs:south) and the bay of Biscay (Gn:north, Gs:south) and positions of the  
 364 sampled points. B - initial randomly stratified sampling plan (1987), C - addition of the Celtic sea (1997), D  
 365 - stabilized sampling plan (2016 to now). Roman numerals of the ICES divisions are also indicated (8.a to  
 366 8.f and 7.d to 7.j).

367

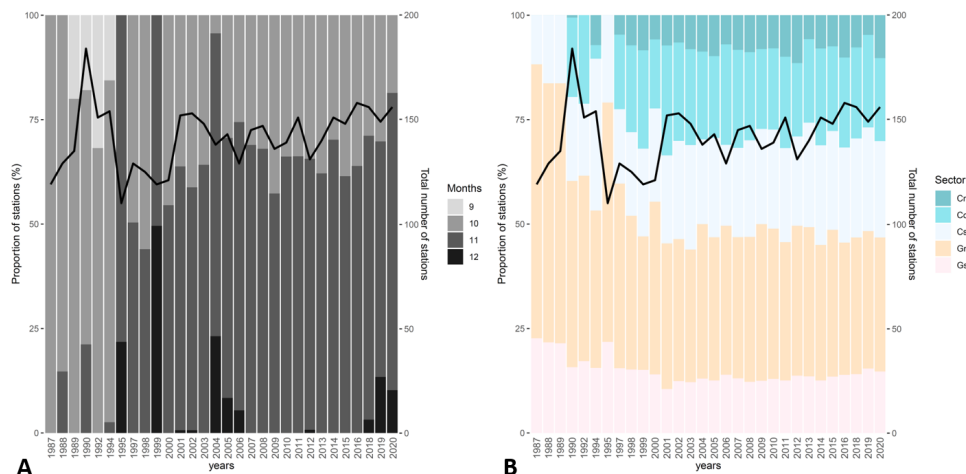

**Figure 2: Distribution of stations sampled for the whole Evhoe time series, A. proportion by sampling months, B. proportion by sampling sectors for autumn survey (only for autumn months: 9,10,11,12). The black lines on both graphs indicates the total number of sampled stations by year.**

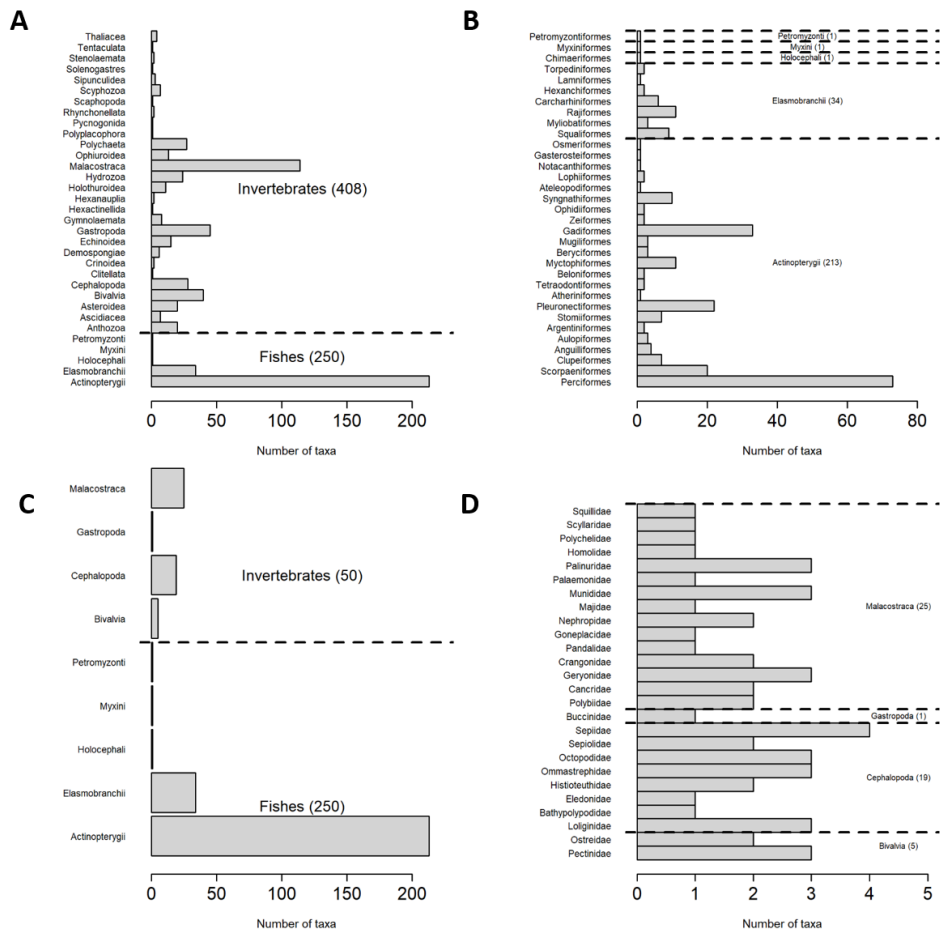

373  
 374 **Figure 3: Number of taxa observed for the whole time series, A. number per classes for all the taxa**  
 375 **(including the benthos species), B. number per order for fishes taxa only, C. number per classes for**  
 376 **commercial list of taxa only (standard evhoe protocole) and D. for “commercial invertebrates” taxa.**  
 377



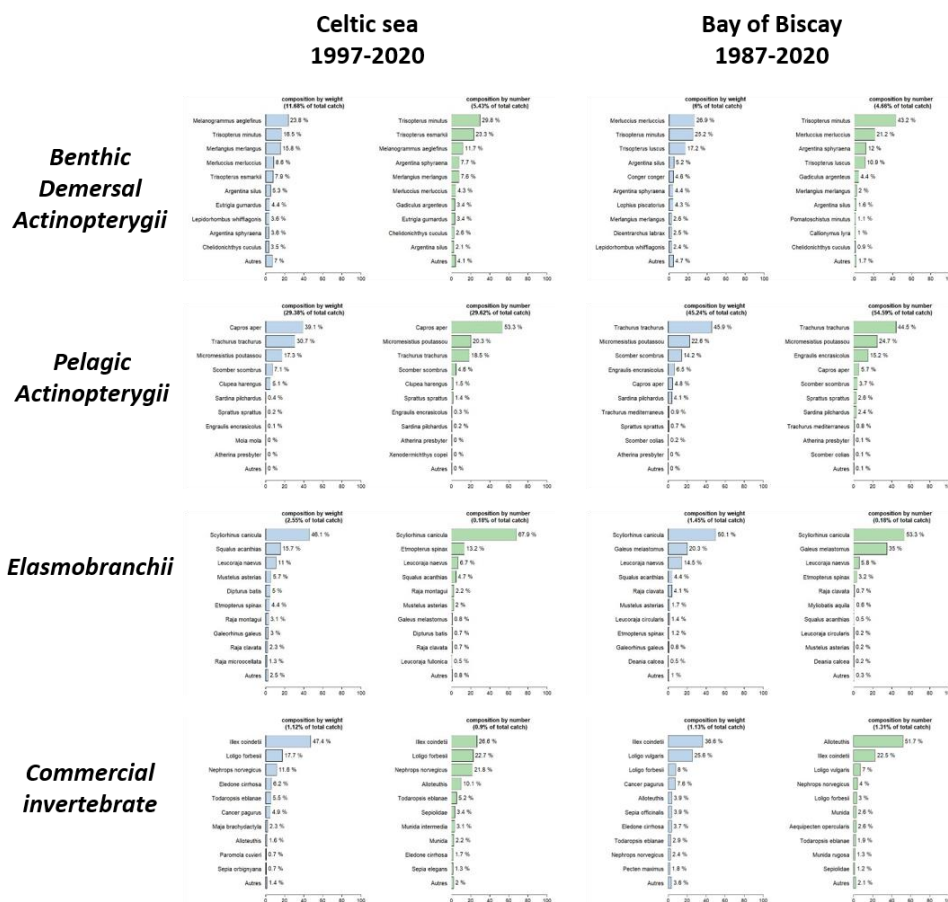

Figure 4: Abundance in number and biomass of the 10 main species observed in the Celtic Sea during EVHOE 1997-2018 and in the Bay of Biscay during EVHOE 1987-2018 for 4 main groups of species: Benthic Demersal Actinopterygii, Pelagic Actinopterygii, Elasmobranchii and Commercial invertebrates.



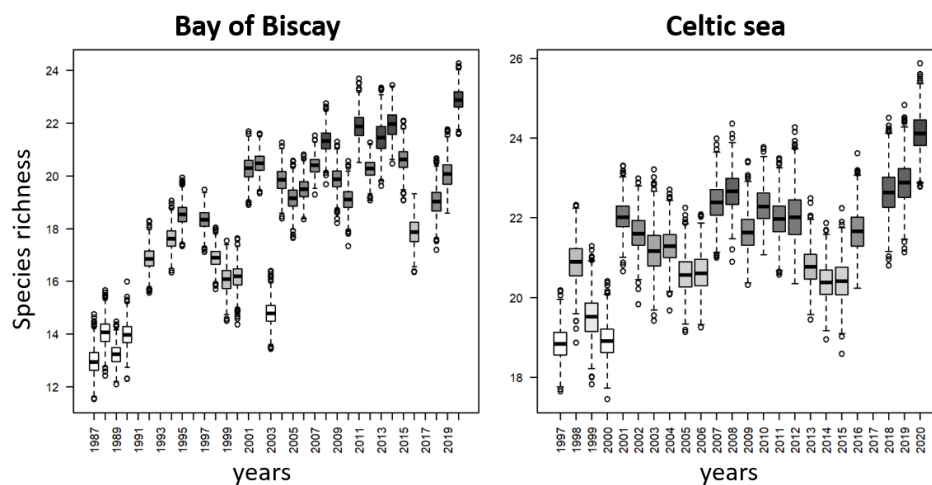

**Figure 5: Boxplots of the fish taxa richness as obtained from bootstrap analysis of the sampling station richness. The colors indicates the clusters depending on years similarities. Analysis is separately performed for the Bay of Biscay and the Celtic Sea for the whole available time series**

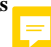

## 7 Appendix



**Appendix A - List of species at risk of misidentification during all or part of the EVHOE time series.**

| Taxonomic group | Dominant species                                                      | Rarer species                                       | Comments                                                                                                                                                                                                                                                                                                                             |
|-----------------|-----------------------------------------------------------------------|-----------------------------------------------------|--------------------------------------------------------------------------------------------------------------------------------------------------------------------------------------------------------------------------------------------------------------------------------------------------------------------------------------|
| Malacostraca    | <i>Munida intermedia</i> ,<br><i>M. rugosa</i>                        | <i>M. rutilanti</i>                                 | species only considered at the genus level at the beginning of the series. Identification at species level from 2007 onward simultaneously with the development of the observation of the "Benthos"; rarer species remain less easily detectable and identifiable on board                                                           |
| Cephalopoda     | <i>Loligo forbesii</i> , <i>L. vulgaris</i> , <i>Alloteuthis</i> spp. |                                                     | Not easy identification between young individuals of the genus <i>Loligo</i> or even with the <i>Alloteuthis</i> which leads to errors during the whole series.                                                                                                                                                                      |
|                 | Sepiolidae                                                            |                                                     | Taken into account from 1995 onward but initially misidentified as « <i>Sepiola</i> or <i>Sepiola atlantica</i> » were regrouped into <i>Sepiolidae</i> . This family encompasses 11 species identified from 2010 onward. The small <i>Rossia</i> spp have generally been put into generic <i>Sepiolidae</i> by mistake before 2010. |
|                 | <i>Rossia macrosoma</i>                                               | <i>R. palpebroso</i>                                | Only large individuals identified as belonging to these taxa (the smaller ones confused with others <i>Sepiolidae</i> ). <i>R. palpebroso</i> only began to be determined in 2016.                                                                                                                                                   |
| Myxini          |                                                                       | <i>Remora brachyptera</i> ,<br><i>Remora remora</i> | Very rare, the presence of the 2 species is possible and confusions are possible                                                                                                                                                                                                                                                     |
| Holocephali     | <i>Chimaera monstrosa</i> ,                                           | <i>Hydrolagus mirabilis</i>                         | Very deep species <i>H. mirabilis</i> observed only in 2004 but possible error                                                                                                                                                                                                                                                       |
| Elasmobranchii  | <i>Deania calcea</i>                                                  | <i>D. profundorum</i>                               | <i>D. profundorum</i> only from 2010 with criteria provided by specialists (MNHN) but irregularity of identification still currently due to probable confusion.                                                                                                                                                                      |
|                 | <i>Dasyatis pastinaca</i>                                             | <i>D. tortonesei</i>                                | <i>D. tortonesei</i> identified only from 2015 with MNHN* expertise and more obvious criteria (criteria have been refined in 2019).                                                                                                                                                                                                  |
|                 | <i>Raja undulata</i> , <i>Raja microocellata</i>                      |                                                     | <i>Raja microocellata</i> more rare before 2000 due to probable confusion                                                                                                                                                                                                                                                            |
|                 | <i>Raja montagui</i>                                                  | <i>Raja brachyura</i>                               | The criteria are difficult (even for specialists) and errors are possible especially before 2010 but still likely in recent years.                                                                                                                                                                                                   |
|                 | <i>Scyliorhinus canicula</i>                                          | <i>Scyliorhinus stellaris</i>                       | Sporadically identified at the beginning of the series, <i>S. stellaris</i> appears more frequent from 2010 which may show confusion between the 2 species.                                                                                                                                                                          |



| Actinopterygii | Taxonomic group | Dominant species                                             | Rarer species                                                                                       | Comments                                                                                                                                                                                                                                   |
|----------------|-----------------|--------------------------------------------------------------|-----------------------------------------------------------------------------------------------------|--------------------------------------------------------------------------------------------------------------------------------------------------------------------------------------------------------------------------------------------|
|                |                 | <i>Dipturus batis</i>                                        | <i>Dipturus intermedia</i> cf                                                                       | Distinction of these 2 species only since 2017; they have always been grouped in <i>D. batis</i> before.                                                                                                                                   |
|                |                 | <i>Torpedo marmorata</i>                                     | <i>Torpedo nobiliana</i>                                                                            | Confusion between these 2 species is very likely, only the name <i>T. marmorata</i> was used in the database until 2019.                                                                                                                   |
|                |                 | <i>Alosa alosa</i> , <i>Alosa fallax</i>                     |                                                                                                     | Potential identification errors between both species on small individuals especially at the beginning of the series                                                                                                                        |
|                |                 | <i>Ammodytes tobianus</i> ,<br><i>Hyperoplus lanceolatus</i> | <i>Ammodytes marinus</i> ,<br><i>Gymnammodytes semisquamatus</i> ,<br><i>Hyperoplus immaculatus</i> | Errors in identification have been frequent; new criteria have been implemented in 2019                                                                                                                                                    |
|                |                 | <i>Argentina silus</i> , <i>A. sphyraena</i>                 |                                                                                                     | For some part of the time series, the occurrence of <i>Argentina sphyraena</i> in the deeper area is doubtful. Small <i>A. silus</i> individuals may have been confused with <i>A. sphyraena</i> .                                         |
|                |                 | <i>Argyropelecus spp</i>                                     |                                                                                                     | Deep-sea species rarely caught - identifications sometimes made by specialists but likely errors during the series                                                                                                                         |
|                |                 | <i>Arnoglossus imperialis</i> ,<br><i>A. laterna</i>         | <i>A. thori</i> A.                                                                                  | Confusion with <i>A. thori</i> is unlikely, but confusion between <i>A. imperialis</i> and <i>A. laterna</i> may have existed during the series; the criteria have been refined since 2019.                                                |
|                |                 | <i>Callionymus lyra</i><br><i>C. maculatus</i>               | <i>C. reticulatus</i>                                                                               | Errors of identification have been frequent; the criteria have been refined since 2019.                                                                                                                                                    |
|                |                 | <i>Coelorhynchus caelorhynchus</i>                           | <i>Hymenocephalus italicus</i><br><i>Nezumia aequalis</i><br><i>Nezumia sclerorhynchus</i>          | Possible misidentifications before 2017 between these rarely caught species with difficult identification criteria                                                                                                                         |
|                |                 | <i>Diplodus spp</i>                                          |                                                                                                     | Rare taxa but potentially 4 species poorly identified                                                                                                                                                                                      |
|                |                 | <i>Engraulis encrasicolus</i>                                | <i>E. cf. albidus</i>                                                                               | Although described in the study area but rare <i>E. albidus</i> not easily identified; criteria better defined since recent years but remains difficult to sort with very high abundances of the much more frequent <i>E. encrasicolus</i> |
|                |                 | <i>Labrus bergylta</i> , <i>L. mixtus</i>                    |                                                                                                     | species rarely caught and possible confusion during the whole time series                                                                                                                                                                  |

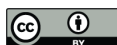

| Taxonomic group | Dominant species                              | Rarer species                                                                          | Comments                                                                                                                                                                                                                                                                                                 |
|-----------------|-----------------------------------------------|----------------------------------------------------------------------------------------|----------------------------------------------------------------------------------------------------------------------------------------------------------------------------------------------------------------------------------------------------------------------------------------------------------|
|                 | <i>Lampanyctus crocodilus</i>                 | <i>L. intricarius</i>                                                                  | For these deep-sea species, the identifications were carried out by specialists few years but the series probably contains errors                                                                                                                                                                        |
|                 |                                               | <i>Liparis liparis</i>                                                                 | To be considered with caution, species very rarely caught and difficult identification criteria.                                                                                                                                                                                                         |
|                 |                                               | <i>Liparis montagui</i>                                                                |                                                                                                                                                                                                                                                                                                          |
|                 | <i>Molva molva</i> , <i>M. macrophthalma</i>  | <i>M. dypterygia</i>                                                                   | Inversion of occurrence from the 2000s onwards in favour of <i>M. macrophthalma</i> due to a reduction of the identification error as compared to the beginning of the series especially with the improved identification supports and criteria between ( <i>M. dypt.</i> and <i>M. macrophthalma</i> ). |
|                 | <i>Notoscopelus kroyeri</i>                   | <i>N. caudispinosus</i> , <i>N. elongatus</i>                                          | For these deep-sea species, the identifications were carried out by specialists.                                                                                                                                                                                                                         |
|                 | <i>Pagellus spp</i>                           |                                                                                        | Errors of identification have been frequent, especially for young individuals; the criteria have been refined since 2018.                                                                                                                                                                                |
|                 | <i>Pomatoschistus minutus</i>                 | <i>P. lozanoi</i> , <i>P. norvegicus</i> , <i>P. pictus</i> , <i>Gobius paganellus</i> | The size of the individuals and the difficulties of identification make certain determinations unreliable, particularly of <i>P. minutus</i> (e.g. only 1 species of the genus <i>Pomatoschistus</i> before 2002).                                                                                       |
|                 | <i>Lesueurigobius friesii</i>                 |                                                                                        |                                                                                                                                                                                                                                                                                                          |
|                 | <i>Scorpaena</i>                              |                                                                                        | Difficulties in identification lead to frequent errors. The species <i>Scorpaena elongata</i> is most probably mistakenly identified and has not been described in the Bay of Biscay from others studies.                                                                                                |
|                 | <i>Syngnathus acus</i>                        | <i>S. phlegon</i> , <i>S. rostellatus</i> , <i>S. typhle</i>                           | Identifications are difficult and errors are likely to occur during the data series; greater attention paid to these species after 2017.                                                                                                                                                                 |
|                 | <i>Trachurus trachurus</i>                    | <i>T. mediterraneus</i> , <i>T. picturatus</i>                                         | The sometimes very high abundance of horse mackerel in the catches and a consecutive important sub-sampling make the detection of closely resembling but rarer species more difficult.                                                                                                                   |
|                 | <i>Trisopterus luscus</i> , <i>T. minutus</i> | <i>T. esmarkii</i>                                                                     | Absence of <i>T. esmarkii</i> especially before 1990 linked to defects of the sampling plan in relation to the distribution area of the species                                                                                                                                                          |

\* MNHN: Museum National d'Histoire Naturelle (French National Museum of Natural History)

#### Author contribution

Preparation of the manuscript: P.Laffargue<sup>1</sup>, D. Delaunay, F.Garren



Data analysis and illustration: P.Laffargue<sup>1</sup>, D. Delaunay

Dataset preparation and processing: V.Badts, O.Berthele, A.S.Cornou, P.Laffargue

### Acknowledgements

We would like to thank all the participants in the Evhoe fishing surveys and in particular the pioneers of the fisheries survey in the bay of Biscay, A.Maucorps, R.Chevalier, J.-C.Quéro, A.Laurec, and the successive heads of mission and observation managers who have been on board since 1987 : Jean-Charles Poulard, A.Charuau, R. Bellail, J.-C. Mahé, J.-P. Léauté, M. Salaün, J. Dimeet, L. Pawlowski, E. Duhamel, N. Caroff, J.-J. Rivolaen, L. Bouche, S. Martin, L. Le Ru, D. Le Roy and more generally the staff of the IFREMER's research units STH, EMH, HMMN and Marbec

We would like to thank all the sailors of GENAVIR, operator of the Thalassa, as well as the "French Oceanographic Fleet" for the technical and organizational support of these fishing surveys.

We would like to thank all the students who sometimes started their career by joining EVHOE and all the colleagues from other institutes and various countries who contributed to the collection of data while allowing us to enhance the value of the samples taken on themes as diverse as original.

Special thanks go to fish identification specialists from IFREMER, from the National Museum of Natural History and from various institutes, J.-C.Quéro, S.Iglésias, J.Spitz, who, through their expertise and regular boardings, have made it possible to ensure the reliability of the identifications on board.

A quality data set could not have been produced without the IFREMER "Fisheries Information System" teams (<https://sih.ifremer.fr/>) for improving the sample processing, banking and data control tools, as well as the administrative managers of these surveys and their financing.

The members of the ICES working groups, and in particular the [WGIBTS group](#), have made it possible to exchange on the protocols of the IBTS surveys and participated in the harmonization of observation at the European level.

The neighbouring countries are thanked (Spain, United-Kingdom, Ireland) for giving access to their territorial waters and thus demonstrating the importance of European collaboration for the production of knowledge useful to all countries.

These surveys were financially supported by Europe through the data collection framework (Regulation (EU) 2017/1004 of 17 May 2017), the responsibility of the organization was transmitted to IFREMER through the French Ministry of Fisheries and Aquaculture (DPMA).

### Competing interests

The authors declare that they have no conflict of interest.
